# Supplementary material for: Dissecting the species-specific recognition of Neoseptin 3 by TLR4/MD2 via molecular dynamics simulations
Source: Royal Society of Chemistry journal article supplement (doi:10.1039/d3cp00949a), 2023-01-01
Supplement: d3cp00949a2.pdf [file d3cp00949a2.pdf]

## Dissecting the species-specific recognition of Neoseptin 3 by TLR4/MD2 via molecular dynamics simulations

Siru Wu,<sup>ab</sup> Cong Zhang,<sup>ab</sup> Yibo Wang,<sup>a</sup> Penghui Li,<sup>c</sup> Xiubo Du,<sup>c</sup> and Xiaohui Wang<sup>\*abd</sup>

<sup>a</sup>Laboratory of Chemical Biology, Changchun Institute of Applied Chemistry, Chinese Academy of Sciences, Changchun, Jilin, 130022, China

<sup>b</sup>School of Applied Chemistry and Engineering, University of Science and Technology of China, Hefei, Anhui, 230026, China

<sup>c</sup>Shenzhen Key Laboratory of Marine Biotechnology and Ecology, College of Life Sciences and Oceanography, Shenzhen University, Shenzhen, Guangdong, 518060, China

<sup>d</sup>Beijing National Laboratory for Molecular Sciences, Beijing, 100190, China

Corresponding Author

Xiaohui Wang, Email: [xiaohui.wang@ciac.ac.cn](mailto:xiaohui.wang@ciac.ac.cn)

### Supporting Information

**Table S1** Summary of protein sequence alignment of TLR4 and MD2 between mouse and human. Comparison and alignment of mouse and human sequences were conducted via pairwise sequence alignment in EMBL-EBI<sup>1</sup>.

|      | Length | Identity       | Similarity     | Gap         |
|------|--------|----------------|----------------|-------------|
| TLR4 | 1-827  | 559/827(67.6%) | 660/827(79.8%) | 4/827(0.5%) |
| MD2  | 1-160  | 103/160(64.4%) | 129/160(80.6%) | 0/160(0.0%) |

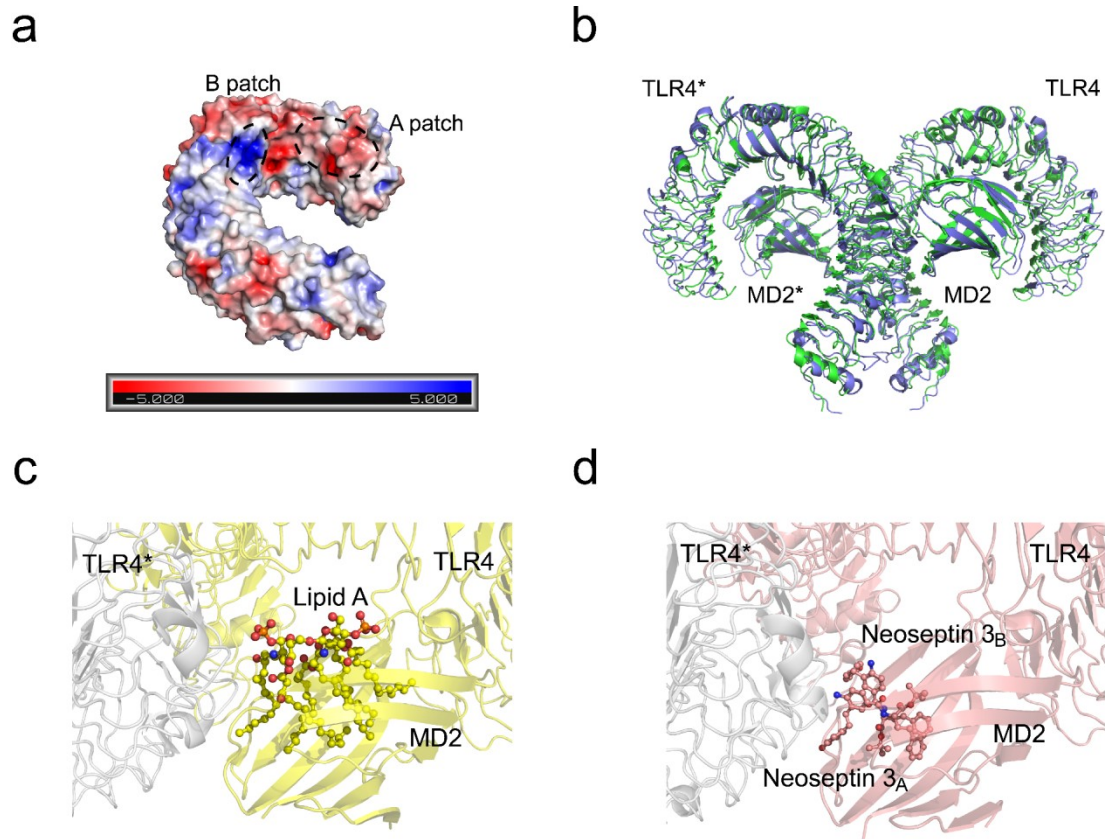

**Fig. S1** (a) A patch and B patch<sup>2</sup> of mouse TLR4 extracted from mouse (TLR4/MD2/2\*Neoseptin 3)<sub>2</sub> heterotetramer (PDB ID: 5IJC<sup>3</sup>); (b) Structural comparison of mouse TLR4/MD2 (green, PDB ID: 5IJD<sup>3</sup>) and human TLR4/MD2 (blue, PDB ID: 3FXI<sup>4</sup>); (c) Position of lipid A in human (TLR4/MD2/Lipid A)<sub>2</sub> (PDB ID: 3FXI<sup>4</sup>); (d) Position of Neoseptin 3 in mouse (TLR4/MD2/2\*Neoseptin 3)<sub>2</sub> (PDB ID: 5IJC<sup>3</sup>). Electrostatic potentials of TLR4 were calculated via APBS program<sup>5</sup> and displayed with PyMol software<sup>6</sup>. Protein was shown as cartoon and ligands were shown as ball-stick models.

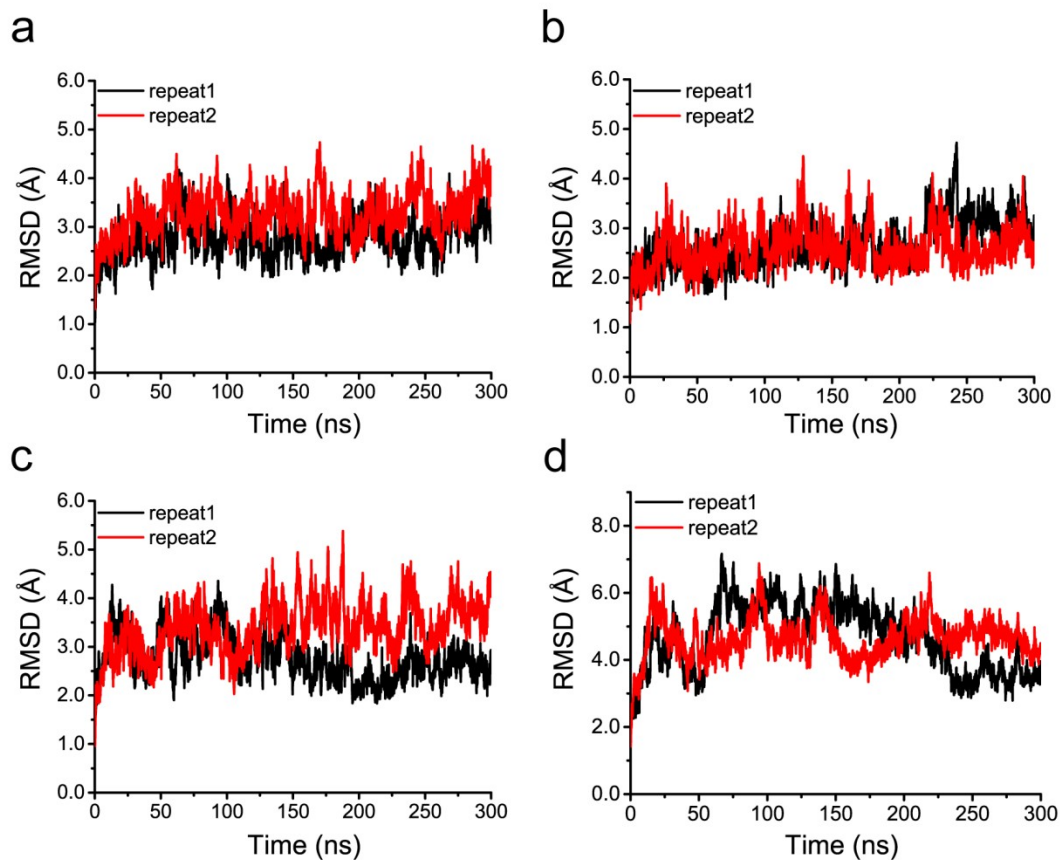

**Fig. S2** RMSDs of the protein backbone during the repeated simulation of (TLR4/MD2)<sub>2</sub> from mouse (a, b) or human (c, d) complexed with lipid A (a, c) or Neoseptin 3 (b, d).

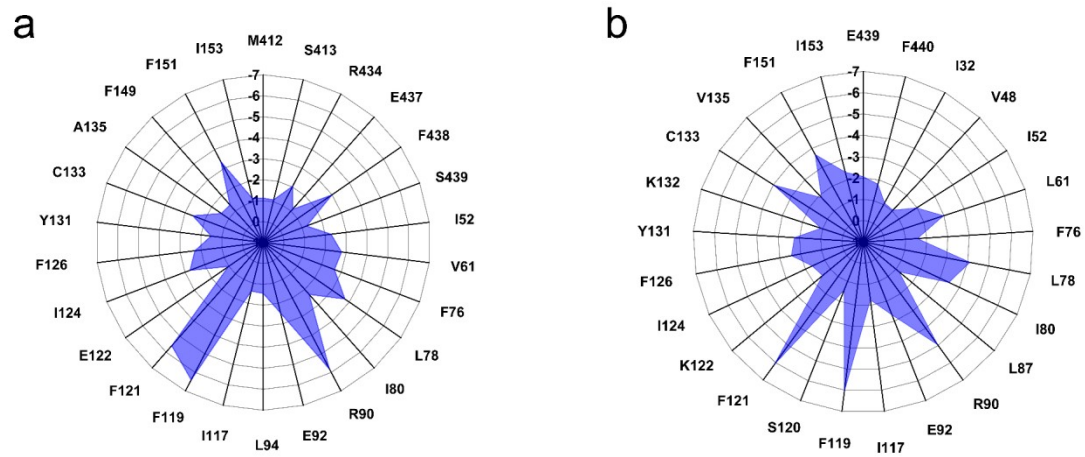

**Fig. S3** Main residues' contributions to the binding of Neoseptin 3 with mouse TLR4/MD2 (a) and human TLR4/MD2 (b) after the energy decomposition of binding free energies. Unit: kcal/mol.

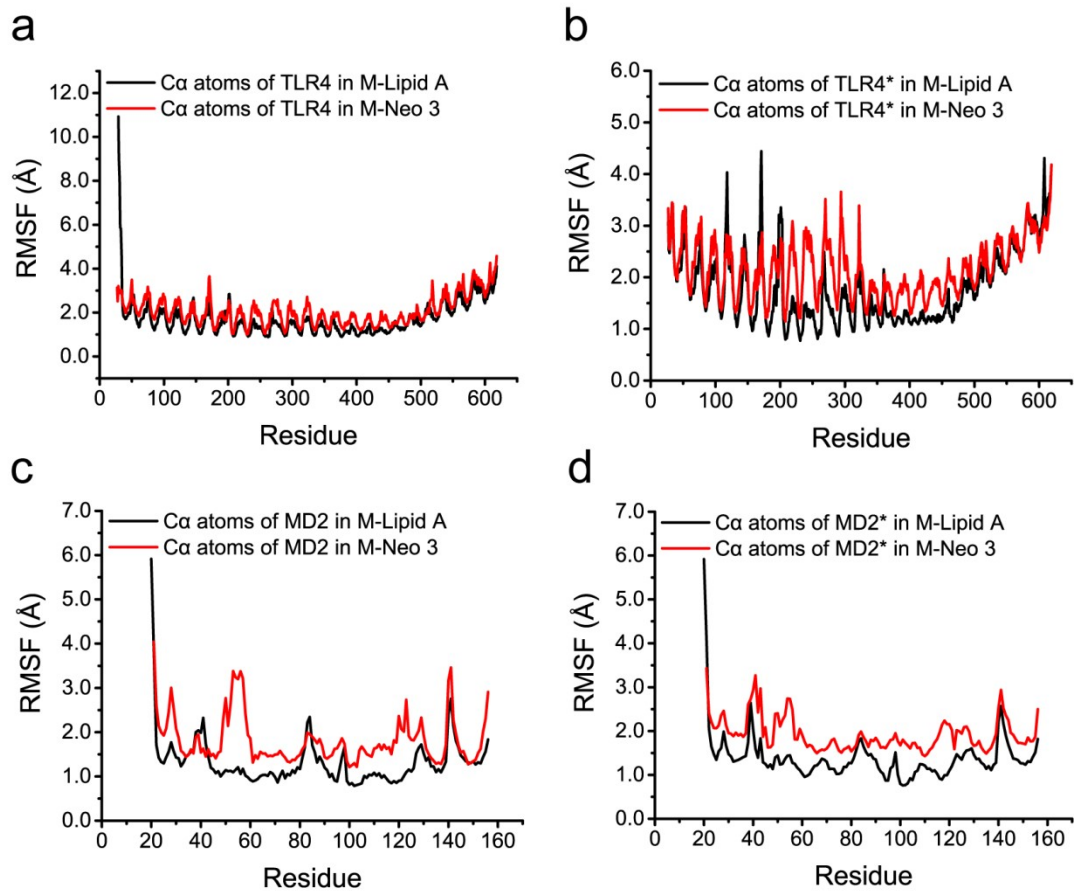

**Fig. S4** RMSF of C $\alpha$  atoms of mouse TLR4 (a), TLR4\* (b), MD2 (c), and MD2\* (d) when bound with lipid A or Neoseptin 3. All replicates of each system were merged together, and the RMSFs were calculated with the merged trajectories for the last 50 ns.

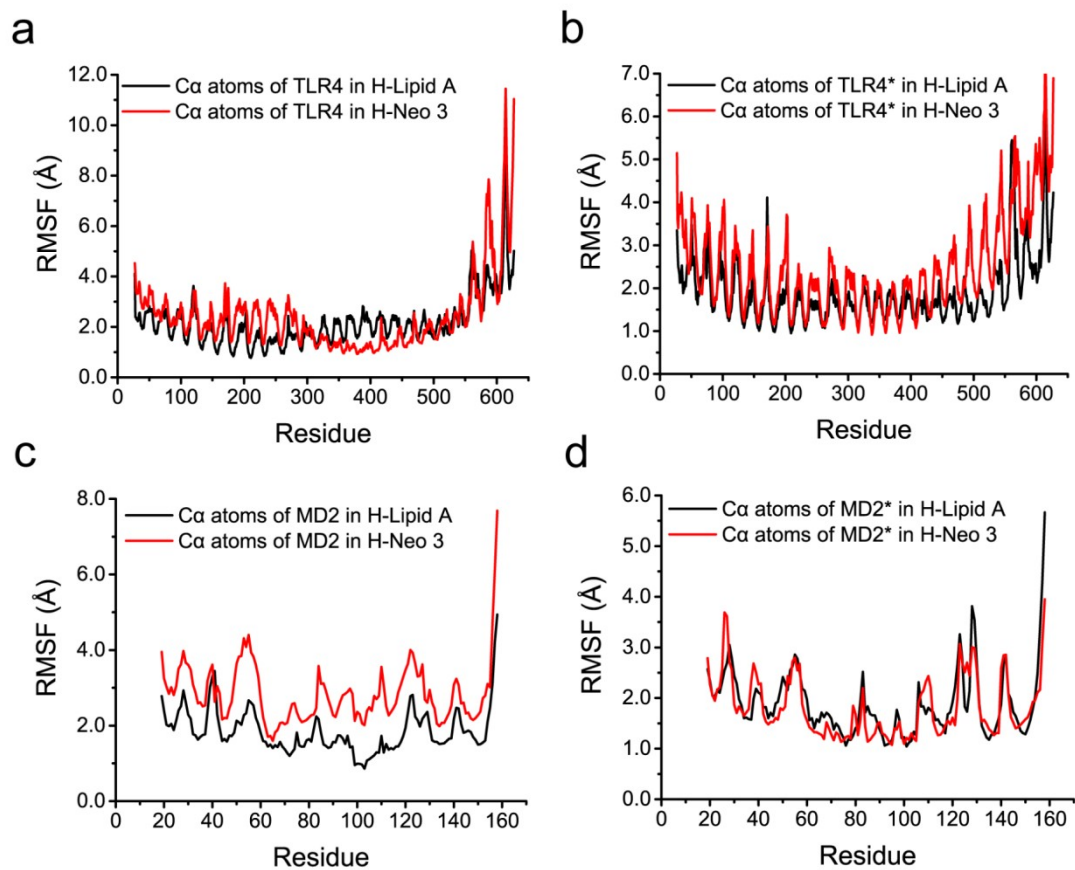

**Fig. S5** RMSF of C $\alpha$  atoms of human TLR4 (a), TLR4\* (b), MD2 (c), and MD2\* (d) when bound with lipid A or Neoseptin 3. All replicates of each system were merged together, and the RMSFs were calculated with the merged trajectories for the last 50 ns.

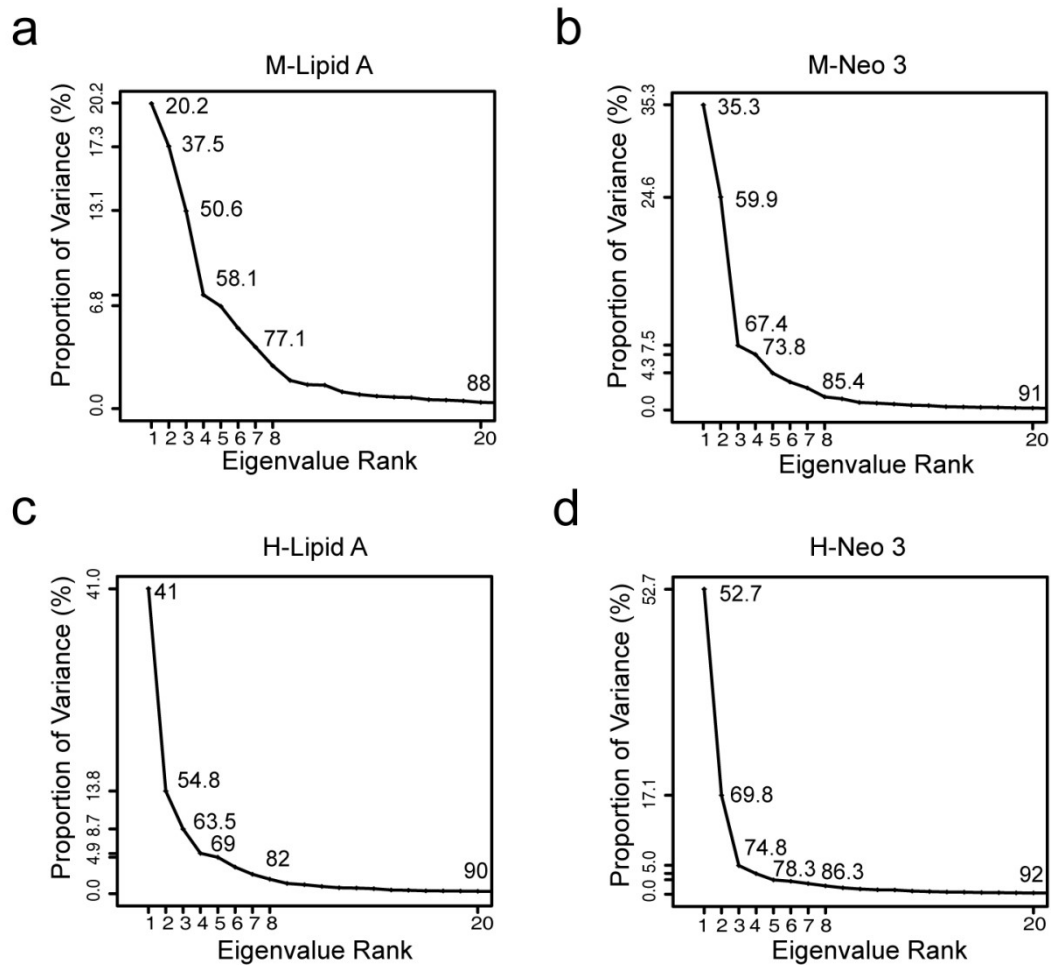

**Fig. S6** Proportion of variance captured by principal components for mouse (TLR4/MD2/Lipid A)<sub>2</sub> (a), mouse (TLR4/MD2/2\*Neoseptin 3)<sub>2</sub> (b), human (TLR4/MD2/Lipid A)<sub>2</sub> (c) and human (TLR4/MD2/2\*Neoseptin 3)<sub>2</sub> (d).

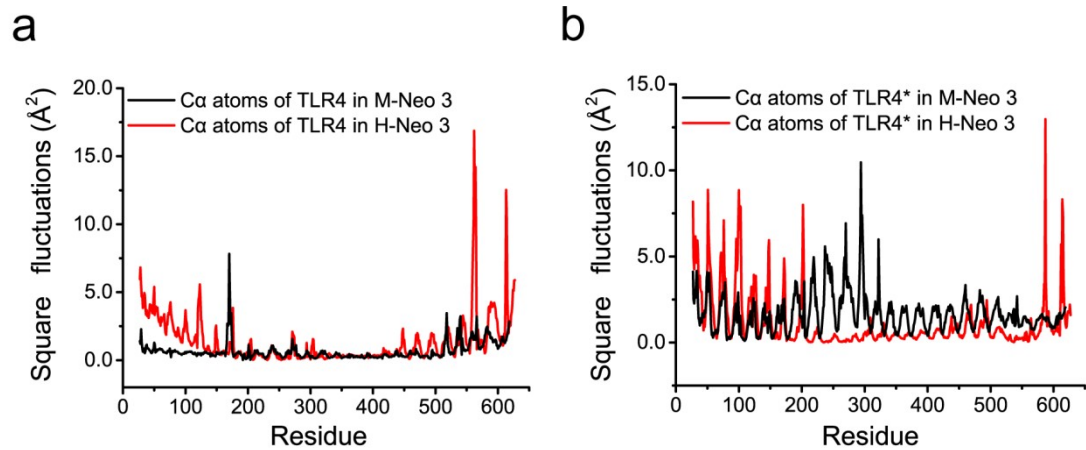

**Fig. S7** The square fluctuations of the second mode of TLR4 (a) or TLR4\* (b) bound with Neoseptin 3.



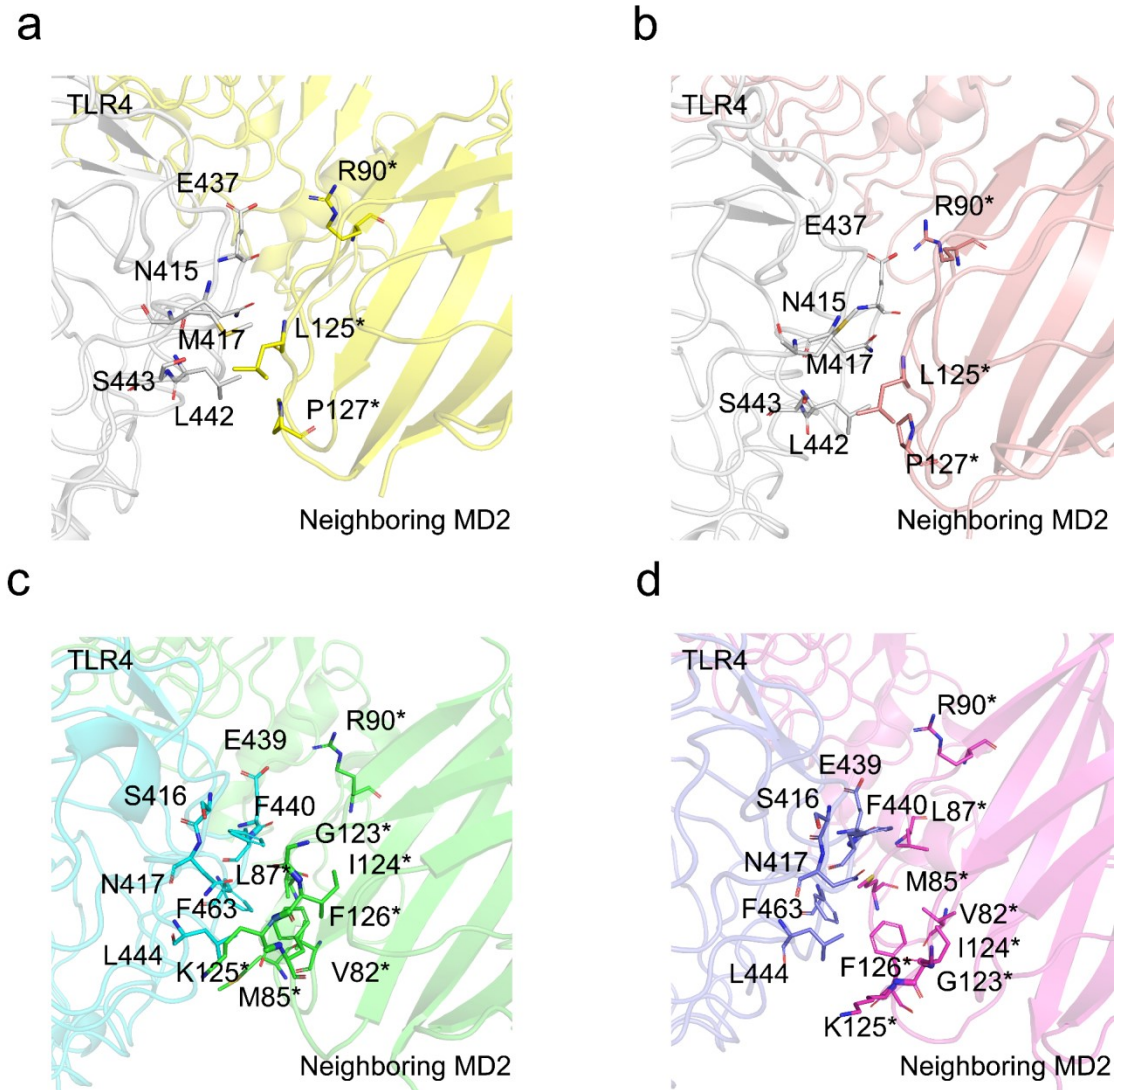

**Fig. S8** Representative conformations and positions of key residues involved in the hydrophobic interactions and hydrogen bonds between TLR4 and neighboring MD2 of mouse (TLR4/MD2/Lipid A)<sub>2</sub> (a), mouse (TLR4/MD2/2\*Neoseptin 3)<sub>2</sub> (b), human (TLR4/MD2/Lipid A)<sub>2</sub> (c), and human (TLR4/MD2/2\*Neoseptin 3)<sub>2</sub> (d). Protein was shown as cartoon and ligands were not shown for clarity. Residues of neighboring MD2 were shown as sticks and labeled with asterisks.

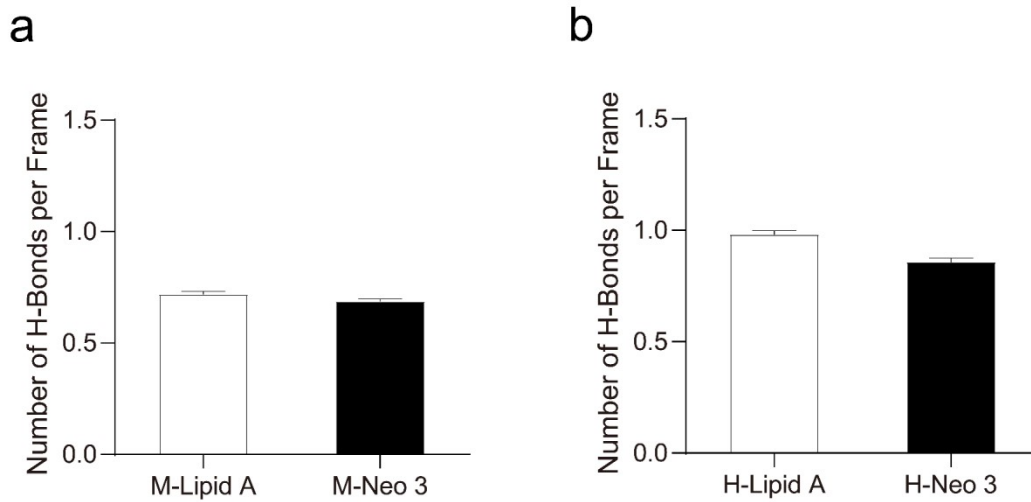

**Fig. S9** Number of hydrogen bonds per frame between TLR4 and neighboring MD2 (including TLR4-MD2\* and TLR4\*-MD2) for mouse (a) or human (b) (TLR4/MD2)<sub>2</sub> interacting with lipid A and Neoseptin 3. All trajectories of replicates for each system were calculated. The data are shown as the mean ± SEM over the last 50 ns of simulations.

## References

1. F. Madeira, M. Pearce, A. R. N. Tivey, P. Basutkar, J. Lee, O. Edbali, N. Madhusoodanan, A. Kolesnikov and R. Lopez, *Nucleic Acids Res*, 2022, **50**, W276-W279.
2. H. M. Kim, B. S. Park, J. I. Kim, S. E. Kim, J. Lee, S. C. Oh, P. Enkhbayar, N. Matsushima, H. Lee, O. J. Yoo and J. O. Lee, *Cell*, 2007, **130**, 906-917.
3. Y. Wang, L. Su, M. D. Morin, B. T. Jones, L. R. Whitby, M. M. Surakattula, H. Huang, H. Shi, J. H. Choi, K. W. Wang, E. M. Moresco, M. Berger, X. Zhan, H. Zhang, D. L. Boger and B. Beutler, *Proc Natl Acad Sci U S A*, 2016, **113**, E884-E893.
4. B. S. Park, D. H. Song, H. M. Kim, B. S. Choi, H. Lee and J. O. Lee, *Nature*, 2009, **458**, 1191-1195.
5. E. Jurrus, D. Engel, K. Star, K. Monson, J. Brandi, L. E. Felberg, D. H. Brookes, L. Wilson, J. Chen, K. Liles, M. Chun, P. Li, D. W. Gohara, T. Dolinsky, R. Konecny, D. R. Koes, J. E. Nielsen, T. Head-Gordon, W. Geng, R. Krasny, G.-W. Wei, M. J. Holst, J. A. McCammon and N. A. Baker, *Protein Science*, 2018, **27**, 112-128.
6. PyMol, *Schrödinger, LLC*, **Version 2.5.0a0**.
